# Supplementary material
Source: PubMed Central journal article supplement (PMC3663497)
Supplement: supp_M112.448258_jbc.M112.448258-1.pdf [file supp_M112.448258_jbc.M112.448258-1.pdf]

| Strain Name | Genotype                                                                                          | Plasmids          | Reference          |
|-------------|---------------------------------------------------------------------------------------------------|-------------------|--------------------|
| BY5459      | MAT a ura3-52 trp1 lys2-801 leu2D1 his3D200 pep4::HIS3 prb1D1.6R can1 GAL                         |                   | ATCC (cat #208284) |
| MPY101      | MAT a cdc34Δ::KanR his3Δ1 leu2Δ0lys2Δ0 ura3Δ0                                                     | pMP140            | (1)                |
| MPY143      | MAT a cdc34Δ::KanR rub1Δ::LEU2 his3Δ1 leu2Δ0 lys2Δ0 ura3Δ0                                        | pMP140            | This work          |
| MPY146      | MAT a cdc34Δ::KanR rub1Δ::LEU2 his3Δ1 leu2Δ0 lys2Δ0 ura3Δ0                                        | pMP140;<br>pMP143 | This work          |
| MPY156      | MAT a rub1Δ::KanR ura3-52 trp1 lys2-801 leu2D1 his3D200 pep4::HIS3 prb1D1.6R can1 GAL             |                   | This work          |
| MPY174      | MAT a rub1Δ::KanR ura3-52 trp1 lys2-801 leu2D1 his3D200 pep4::HIS3 prb1D1.6R can1 GAL             | pMP310            | This work          |
| MPY201      | MAT a rri1Δ::KanR rub1Δ::LEU2 ura3-52 trp1 lys2-801 leu2D1 his3D200 pep4::HIS3 prb1D1.6R can1 GAL |                   |                    |
| MPY202      | MAT a cdc34Δ::KanR rub1Δ::LEU2 rri1Δ::NAT his3Δ1 leu2Δ0 lys2Δ0 ura3Δ0                             | pMP140            | This work          |
| MPY210      | MAT a cdc34Δ::KanR his3Δ1 leu2Δ0 lys2Δ0 ura3Δ0                                                    | pMP143;<br>pMP548 | This work          |
| MPY211      | MAT a cdc34Δ::KanR rub1Δ::LEU2 his3Δ1 leu2Δ0 met15Δ0 ura3Δ0                                       | pMP144;<br>pMP309 | This work          |
| MPY212      | MAT a cdc34Δ::KanR rub1Δ::LEU2 his3Δ1 leu2Δ0 met15Δ0 ura3Δ0                                       | pMP143;<br>pMP309 | This work          |
| MPY213      | MAT a cdc34Δ::KanR rub1Δ::LEU2 his3Δ1 leu2Δ0 met15Δ0 ura3Δ0                                       | pMP144;<br>pMP310 | This work          |
| MPY214      | MAT a cdc34Δ::KanR rub1Δ::LEU2 his3Δ1 leu2Δ0 met15Δ0 ura3Δ0                                       | pMP143;<br>pMP310 | This work          |
| MPY231      | MAT a rub1Δ::KanR ura3-52 trp1 lys2-801 leu2D1 his3D200 pep4::HIS3 prb1D1.6R can1 GAL             | pMP310;<br>pMP548 | This work          |
| MPY257      | MAT a rri1Δ::KanR rub1Δ::LEU2 ura3-52 trp1 lys2-801 leu2D1 his3D200 pep4::HIS3 prb1D1.6R can1 GAL | pMP310            | This work          |

|        |                                                                                                                              |                                    |           |
|--------|------------------------------------------------------------------------------------------------------------------------------|------------------------------------|-----------|
| MPY310 | MAT a <i>cdc34Δ::KanR</i><br><i>his3Δ1 leu2Δ0 lys2Δ0 ura3Δ0</i>                                                              | <i>pMP143</i> ;<br><i>pMP552</i>   | This work |
| MPY311 | MAT a <i>rri1Δ::KanR rub1Δ::LEU2</i><br><i>ura3-52 trp1 lys2-801 leu2D1 his3D200</i><br><i>pep4::HIS3 prb1D1.6R can1 GAL</i> | <i>pMP526</i>                      | This work |
| PY1    | MAT a <i>bar1Δ ura3Δns ade1 his2 leu2-3, 112 trp1-1a</i>                                                                     |                                    | (2)       |
| PY175  | MAT a <i>cdc53-1</i><br><i>bar1Δ ura3Δns ade1 his2 leu2-3, 112 trp1-1a</i>                                                   |                                    | (3)       |
| PY283  | MAT a <i>met30-6</i><br><i>bar1Δ ura3Δns ade1 his2 leu2-3, 112 trp1-1a</i>                                                   |                                    | (4)       |
| PY1374 | MAT a <i>skp1Δ::KanR</i><br><i>bar1Δ ura3Δns ade1 his2 leu2-3, 112 trp1-1a</i>                                               | <i>skp1-25</i><br><i>YCp::TRP1</i> | (5)       |

**Supplemental table 1.** Complete list of *S. cerevisiae* strains used in this study.

| Plasmid name | Insert                | Background | Origin    |
|--------------|-----------------------|------------|-----------|
| pMP139       | none                  | pRS313     | (6)       |
| pMP140       | Cdc34p-yCDC34         | pRS316     | (1)       |
| pMP143       | Cdc34p-hCDC34-myc13   | pRS313     | This work |
| pMP144       | Cdc34p-yCdc34-myc13   | pRS313     | This work |
| pMP195       | UBC12-His6            | pFastBac1  | This work |
| pMP198       | none                  | YCplac33   | (7)       |
| pMP200       | none                  | YEplac181  | (7)       |
| pMP224       | NEDD8                 | pET11b     | (8)       |
| pMP247       | ULA1-His6             | pFastBac1  | (8)       |
| pMP248       | UBA3                  | pFastBac1  | (8)       |
| pMP265       | none                  | pRS317     | (9)       |
| pMP279       | Rub1p-NEDD8           | pRS317     | This work |
| pMP309       | ADHp-RUB1             | pRS317     | This work |
| pMP310       | ADHp-NEDD8            | pRS317     | This work |
| pMP490       | NEDD8 Q40E            | pET11b     | This work |
| pMP503       | FLAG-CSN2             | pCDNA3.1-  | This work |
| pMP526       | ADHp-NEDD8-Q40E       | pRS317     | This work |
| pMP548       | GALp-3XFLAG-CIF       | YCplac33   | This work |
| pMP552       | GALp-3XFLAG-CIF-C109S | YCplac33   | This work |
| pMP644       | Rub1p-RUB1            | pRS317     | This work |
| pMP661       | ADHp-HA-DCN1          | YEplac181  | This work |
| pMP663       | ADHp-UBC12-myc6       | YEplac181  | This work |

**Supplemental table 2.** Complete list of plasmids used in this study.

## REFERENCES

- Petroski, M. D., Kleiger, G., and Deshaies, R. J. (2006) Evaluation of a diffusion-driven mechanism for substrate ubiquitination by the SCF-Cdc34 ubiquitin ligase complex. *Mol Cell* **24**, 523-534
- Reed, S. I., Hadwiger, J. A., and Lorincz, A. T. (1985) Protein kinase activity associated with the product of the yeast cell division cycle gene CDC28. *Proc Natl Acad Sci U S A* **82**, 4055-4059
- Yen, J. L., Su, N. Y., and Kaiser, P. (2005) The yeast ubiquitin ligase SCF<sup>Met30</sup> regulates heavy metal response. *Mol Biol Cell* **16**, 1872-1882
- Kaiser, P., Sia, R. A., Bardes, E. G., Lew, D. J., and Reed, S. I. (1998) Cdc34 and the F-box protein Met30 are required for degradation of the Cdk-inhibitory kinase Swe1. *Genes Dev* **12**, 2587-2597
- Aghajan, M., Jonai, N., Flick, K., Fu, F., Luo, M., Cai, X., Ouni, I., Pierce, N., Tang, X., Lomenick, B., Damoiseaux, R., Hao, R., Del Moral, P. M., Verma, R., Li, Y., Li, C., Houk, K. N., Jung, M. E., Zheng, N., Huang, L., Deshaies, R. J., Kaiser, P., and Huang, J. (2010) Chemical genetics screen for enhancers of rapamycin identifies a specific inhibitor of an SCF family E3 ubiquitin ligase. *Nat Biotechnol* **28**, 738-742
- Sikorski, R. S., and Hieter, P. (1989) A system of shuttle vectors and yeast host strains designed for efficient manipulation of DNA in *Saccharomyces cerevisiae*. *Genetics* **122**, 19-27
- Gietz, R. D., and Sugino, A. (1988) New yeast-*Escherichia coli* shuttle vectors constructed with in vitro mutagenized yeast genes lacking six-base pair restriction sites. *Gene* **74**, 527-534

8. Toth, J. I., Yang, L., Dahl, R., and Petroski, M. D. (2012) A gatekeeper residue for NEDD8-activating enzyme inhibition by MLN4924. *Cell Rep* **1**, 309-316
9. Eriksson, P., Thomas, L. R., Thorburn, A., and Stillman, D. J. (2004) pRS yeast vectors with a LYS2 marker. *Biotechniques* **36**, 212-213
